# Supplementary figures and images for: The clinical frailty scale predicts 1‐year mortality in emergency department patients aged 65 years and older
Source: PubMed Central journal article supplement — Acad Emerg Med. 2022 Apr 23;29(5):572–80. doi: 10.1111/acem.14460 (PMC9320818; doi:10.1111/acem.14460), 2022-04-23

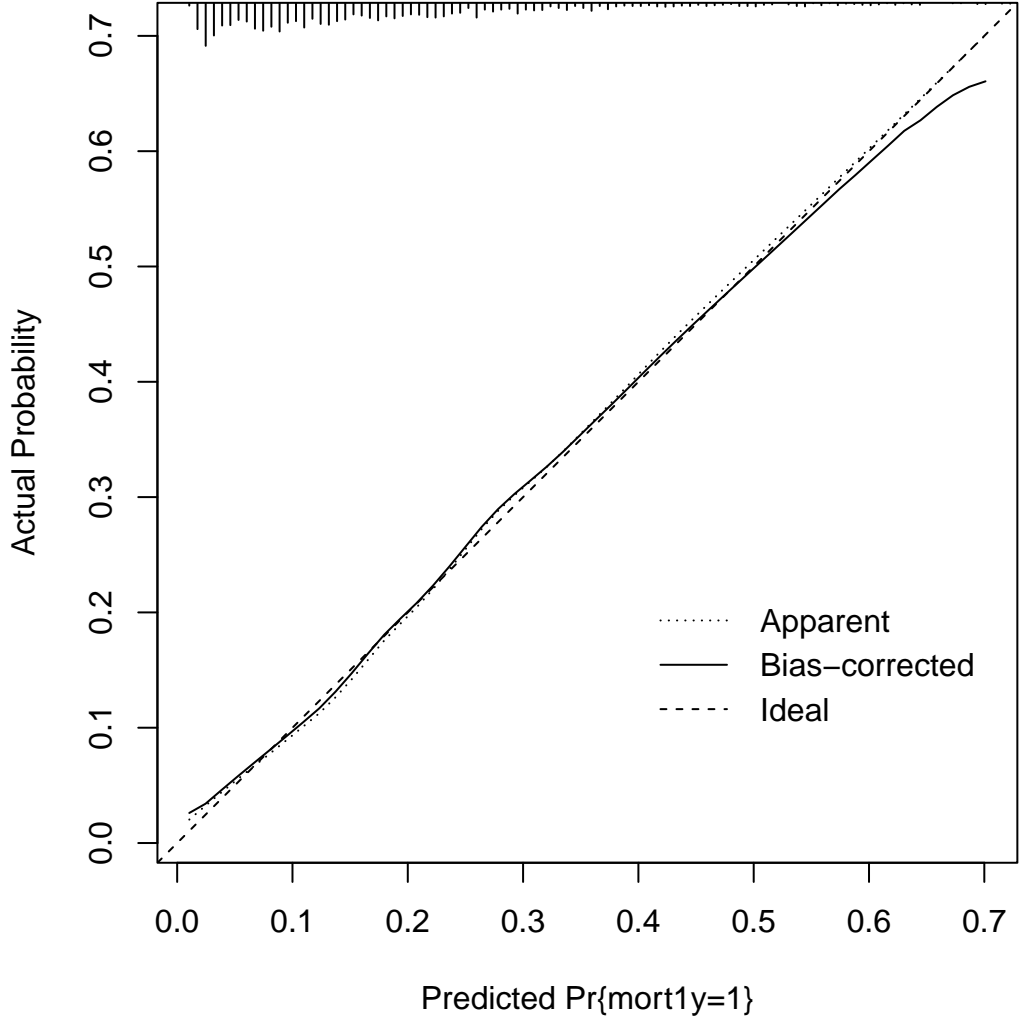

B= 200 repetitions, boot

Mean absolute error=0.005 n=2126

Supplement: ACEM-29-572-s001.pdf [file ACEM-29-572-s001.pdf]
